# Supplementary material for: Systematic study of TiO2/ZnO mixed metal oxides for CO2 photoreduction
Source: RSC Adv. 2019 Jul 12;9(38):21660–6. doi: 10.1039/c9ra03435h (PMC9066424; doi:10.1039/c9ra03435h)
Supplement: RA-009-C9RA03435H-s001 [file RA-009-C9RA03435H-s001.xlsx]

## Sheet: Experimental_conditions
Date complete	No.	Exp	Wavelength (nm)	CO2 flow rate (ml/min)	Ar flow rate (ml/min)	Temp bubbler (°C)	Temp reactor (°C)	Pressure (bar)	Irradiance (mW/cm2)	Cat Loading (mg)	RH (%)
18/01/19	1	MO1	365	0.35	0	25	42.7	1	294	75	38.66
25/01/19	2	MO2	365	0.35	0	25	41.5	1	297	71.9	37.87
26/01/19	3	MO3	365	0.35	0	25	40.6	1	294	89.8	37.87
29/01/19	4	MO7	365	0.35	0	25	40.9	1	297	76.4	37.85
3/2/2019	6	MO4	365	0.35	0	25	41.9	1	297	63.1	37.35
5/2/2019	7	MO5	365	0.35	0	25	41.3	1	297	77.3	37.32
7/2/2019	8	MO6	365	0.35	0	25	41.5	1	294	77.4	36.27

## Sheet: CO_production
CO production (umol.gcat-1.h-1)
Time (h)	MO1	MO2	MO3	MO4	MO5	MO6	MO7		*Time 0 h taken as point where production first detected by GC
0	1.40606	0.513847	0.203245	0.150946	0.359205	0.454821	0.288579
0.0730556	1.58252	0.614615	0.230622	0.191349	0.4166	0.541168	0.327494
0.146111	1.67986	0.689507	0.256908	0.213283	0.474314	0.608144	0.375536
0.219444	1.74754	0.753597	0.282244	0.235949	0.528585	0.671212	0.413044
0.2925	1.79003	0.803115	0.30336	0.255395	0.579649	0.718935	0.446103
0.365	1.80599	0.857423	0.328165	0.258568	0.623252	0.771607	0.482
0.438056	1.81331	0.90979	0.343489	0.278295	0.659397	0.810545	0.502398
0.510556	1.81076	0.958703	0.364452	0.282086	0.697118	0.843554	0.527181
0.583889	1.8062	1.00731	0.380604	0.289494	0.730397	0.883302	0.542741
0.656667	1.78923	1.04653	0.395804	0.294967	0.764233	0.90754	0.5683
0.729444	1.7808	1.0706	0.409321	0.294158	0.795286	0.940054	0.597257
0.802778	1.7619	1.09088	0.428627	0.308135	0.820454	0.971252	0.614882
0.875278	1.75766	1.11852	0.439896	0.310879	0.85108	0.998406	0.631819
0.948333	1.74367	1.14242	0.451964	0.315473	0.875357	1.02188	0.640185
1.02139	1.73416	1.16581	0.457327	0.313663	0.89696	1.04994	0.658758
1.09444	1.71645	1.19152	0.469539	0.316728	0.91969	1.06218	0.67312
1.1675	1.69798	1.20167	0.481551	0.318463	0.943349	1.08265	0.687259
1.24056	1.70099	1.23007	0.489264	0.319707	0.960091	1.09779	0.693042
1.31361	1.69374	1.23429	0.49979	0.32637	0.970382	1.11724	0.716095
1.38611	1.69722	1.24337	0.513593	0.32499	0.988378	1.13187	0.722741
1.45889	1.68196	1.25391	0.518936	0.323072	1.01385	1.15508	0.733533
1.53222	1.67074	1.27693	0.523332	0.331297	1.01875	1.17134	0.747548
1.605	1.65463	1.27995	0.529021	0.329173	1.03056	1.18488	0.75904
1.67778	1.6477	1.29638	0.537724	0.337456	1.04456	1.19462	0.763882
1.75056	1.64279	1.29669	0.547193	0.335973	1.06071	1.19654	0.778326
1.82333	1.64734	1.31022	0.556421	0.327152	1.0708	1.20688	0.785741
1.89667	1.64066	1.31585	0.556574	0.334829	1.08861	1.21897	0.784991
1.96972	1.63636	1.32649	0.565041	0.334671	1.08863	1.22985	0.800057
2.0425	1.636	1.33655	0.56352	0.333841	1.10542	1.24452	0.812239
2.11528	1.62587	1.34631	0.572502	0.33261	1.11312	1.2546	0.811952
2.18833	1.62145	1.355	0.57096	0.335449	1.11637	1.25445	0.817873
2.26139	1.6169	1.36029	0.584695	0.333202	1.12055	1.2529	0.822242
2.33444	1.61849	1.35947	0.582704	0.341454	1.13267	1.26461	0.835608
2.4075	1.6274	1.36409	0.591568	0.336202	1.14434	1.26947	0.841665
2.48028	1.62076	1.3696	0.595856	0.335399	1.15293	1.27463	0.846159
2.55333	1.61945	1.37147	0.59713	0.341408	1.16361	1.28727	0.84998
2.62611	1.60761	1.37197	0.603338	0.340284	1.17191	1.28852	0.852564
2.69917	1.59981	1.37886	0.603839	0.337778	1.1776	1.2945	0.84441
2.77222	1.60616	1.3773	0.603743	0.342546	1.17762	1.29074	0.859042
2.84528	1.60216	1.38801	0.607308	0.340674	1.18001	1.29531	0.86349
2.91833	1.6139	1.3926	0.616198	0.336746	1.18263	1.30672	0.871117
2.99111	1.61154	1.39823	0.616459	0.330873	1.18727	1.31594	0.875961
3.06417	1.60186	1.40726	0.617325	0.334016	1.19058	1.31598	0.881942
3.13694	1.59907	1.39657	0.618839	0.339443	1.19688	1.31866	0.878727
3.20972	1.59547	1.39913	0.619796	0.341338	1.19869	1.31108	0.886245
3.28306	1.60128	1.40667	0.622699	0.33987	1.20898	1.31309	0.889247
3.35611	1.60028	1.40373	0.62433	0.343183	1.21495	1.32377	0.892465
3.42889	1.60422	1.42135	0.630484	0.335082	1.21564	1.33356	0.898889
3.50167	1.59874	1.41903	0.63141	0.332592	1.21206	1.33574	0.892853
3.57472	1.59969	1.40913	0.636333	0.334264	1.21807	1.34	0.892545
3.64722	1.59726	1.41448	0.631707	0.342467	1.22361	1.3339	0.890763
3.72056	1.59587	1.42612	0.635342	0.334296	1.22071	1.33207	0.886676
3.79361	1.60105	1.41616	0.635903	0.336862	1.22987	1.33376	0.899692
3.86639	1.59906	1.41047	0.641103	0.337458	1.23378	1.33256	0.902912
3.93917	1.59656	1.42179	0.637688	0.330467	1.24068	1.33815	0.900434
4.01194	1.59069	1.42367	0.646021	0.334655	1.24275	1.3421	0.897434
4.08472	1.59219	1.41483	0.638806	0.338651	1.24099	1.34312	0.90304
4.15778	1.59068	1.43283	0.639526	0.343836	1.23892	1.34555	0.907408
4.23056	1.58751	1.42564	0.638162	0.343252	1.23501	1.34734	0.909685
4.30333	1.5977	1.41933	0.64374	0.338695	1.23392	1.33838	0.909894
4.37611	1.59328	1.41701	0.64277	0.338752	1.25118	1.33653	0.906271
4.44944	1.59248	1.41932	0.643809	0.337943	1.24362	1.33957	0.914003
4.52222	1.59336	1.42148	0.647709	0.333805	1.24432	1.34858	0.913861
4.59528	1.59547	1.41947	0.645066	0.341125	1.24604	1.35769	0.914319
4.66833	1.59308	1.42191	0.647301	0.335351	1.24403	1.35059	0.913083
4.74139	1.58873	1.41996	0.646233	0.335408	1.24436	1.35022	0.916146
4.81444	1.58495	1.43028	0.647704	0.334749	1.24607	1.34536	0.922085
4.88722	1.58438	1.42276	0.647289	0.331847	1.25133	1.35183	0.917651
4.96	1.58405	1.41739	0.645756	0.329951	1.24744	1.35356	0.919369
5.03333	1.58938	1.41509	0.649505	0.331551	1.24724	1.3602	0.920488
5.10611	1.59096	1.41832	0.647082	0.334545	1.25082	1.35744	0.910176
5.17889	1.58998	1.41702	0.649585	0.336096	1.25305	1.34806	0.913738
5.25194	1.59169	1.42307	0.649865	0.332598	1.25869	1.35639	0.919402
5.32444	1.58003	1.42187	0.6487	0.331002	1.25124	1.35467	0.912274
5.3975	1.59295	1.41755	0.648989	0.326975	1.25347	1.36172	0.911784
5.47	1.59237	1.41188	0.651326	0.337294	1.24797	1.35894	0.920854
5.54306	1.58664	1.41923	0.65057	0.333854	1.25807	1.36036	0.92122
5.61611	1.58533	1.41164	0.657966	0.336181	1.25824	1.35842	0.918618
5.68917	1.58553	1.41982	0.654314	0.333129	1.25453	1.3585	0.92073
5.76194	1.58229	1.41837	0.65184	0.327717	1.25324	1.35179	0.922846
5.83444	1.58259	1.42007	0.650842	0.33018	1.25152	1.35108	0.920378
5.90778	1.5829	1.41141	0.653626	0.331794	1.25602	1.35108	0.918143
5.98083	1.58579	1.40858	0.65399	0.328245	1.25864	1.35447	0.923866

## Sheet: CH4_production
CH4 production (umol.gcat-1.h-1)
Time (h)	MO1	MO2	MO3	MO4	MO5	MO6	MO7		*Time 0 h taken as point where production first detected by GC
0	0.11166	0.021454	0.00380311	0	0.00913036	0.0215267	0.00473286
0.0730556	0.135865	0.0257523	0.00439013	0	0.0132523	0.0247398	0.00509527
0.146111	0.15998	0.0344162	0.00517697	0	0.0146745	0.0312635	0.00539158
0.219444	0.179356	0.0378333	0.00768138	0	0.018089	0.0328618	0.00609627
0.2925	0.195296	0.0357718	0.00631867	0	0.0217127	0.0391747	0.00809028
0.365	0.213294	0.0362637	0.0077963	0	0.0248409	0.0422837	0.00741866
0.438056	0.226443	0.0391909	0.00755286	0	0.0263654	0.0451762	0.0102769
0.510556	0.237494	0.0457841	0.011105	0	0.0301223	0.0467328	0.00761732
0.583889	0.247046	0.043148	0.0105812	0	0.0308696	0.0473588	0.0108914
0.656667	0.25189	0.0459097	0.0102909	0.0048454	0.0323348	0.0543756	0.00902174
0.729444	0.257147	0.0447759	0.00949257	0	0.0345023	0.0516187	0.00895873
0.802778	0.261434	0.044907	0.011031	0	0.0315323	0.0561077	0.0116197
0.875278	0.265602	0.0438425	0.0110322	0	0.0375336	0.0585837	0.010797
0.948333	0.273884	0.046532	0.0100409	0	0.0369252	0.0583172	0.0120507
1.02139	0.275002	0.0441935	0.0115	0	0.0399041	0.0622175	0.0101886
1.09444	0.276938	0.045713	0.0117617	0	0.0391583	0.0607847	0.0114242
1.1675	0.278315	0.0444541	0.0123169	0	0.0396984	0.0621387	0.0128344
1.24056	0.274887	0.0472347	0.0112341	0	0.0407684	0.0617472	0.0133373
1.31361	0.27969	0.0433275	0.0120877	0	0.0394794	0.0618616	0.0124219
1.38611	0.284513	0.0441933	0.0124308	0	0.0393539	0.0617667	0.0117511
1.45889	0.281502	0.0461907	0.0115064	0.00532895	0.0393719	0.0625827	0.0126376
1.53222	0.278896	0.0436889	0.0119479	0	0.0376666	0.0657322	0.0133483
1.605	0.279145	0.041271	0.011512	0	0.0398314	0.0660866	0.0128607
1.67778	0.278896	0.0399139	0.0133487	0	0.0407743	0.0633004	0.013719
1.75056	0.279963	0.0413504	0.0125502	0	0.0398176	0.0638955	0.0134343
1.82333	0.277833	0.0417531	0.0122202	0.00442741	0.038509	0.0654143	0.013672
1.89667	0.277702	0.0442077	0.012717	0	0.0474876	0.0631554	0.0118238
1.96972	0.28284	0.045583	0.0122745	0	0.0391751	0.0633249	0.0128349
2.0425	0.281138	0.0463964	0.011898	0	0.0393377	0.0605025	0.0127062
2.11528	0.279459	0.0469715	0.0126997	0	0.0386014	0.0654694	0.0138306
2.18833	0.272544	0.0425347	0.0122145	0	0.0380916	0.0631876	0.0129709
2.26139	0.273617	0.0461171	0.0120305	0	0.040706	0.0638733	0.0113447
2.33444	0.278775	0.0440519	0.0134358	0	0.0400286	0.060891	0.0137697
2.4075	0.277813	0.0436263	0.0125097	0	0.0397457	0.0635176	0.0133458
2.48028	0.276685	0.0481775	0.0124799	0	0.0369532	0.0615584	0.0112372
2.55333	0.279597	0.0408211	0.0115727	0	0.03944	0.0619857	0.0121671
2.62611	0.275312	0.0460155	0.0122784	0	0.0398572	0.0662522	0.0124993
2.69917	0.273618	0.0430453	0.0132577	0	0.0407144	0.0634144	0.0117035
2.77222	0.272847	0.044554	0.0117603	0	0.0421576	0.0614492	0.0134861
2.84528	0.274322	0.0449286	0.0122525	0	0.0392346	0.0627943	0.0112476
2.91833	0.278833	0.043282	0.0139179	0	0.0385313	0.0626534	0.0127025
2.99111	0.272342	0.0429111	0.0123735	0	0.0419496	0.0666834	0.0131624
3.06417	0.271731	0.0466003	0.0123441	0	0.0376303	0.0644612	0.0132782
3.13694	0.270271	0.0455112	0.0122206	0	0.0392648	0.0647219	0.0144464
3.20972	0.269763	0.0465093	0.0130698	0	0.0421566	0.0622259	0.0120187
3.28306	0.271313	0.0473665	0.0116447	0	0.0412541	0.0632335	0.0106922
3.35611	0.275661	0.0455278	0.012965	0	0.0404249	0.0652271	0.0122078
3.42889	0.274721	0.0452595	0.0121807	0	0.0407044	0.0631234	0.0142221
3.50167	0.270649	0.0448386	0.0112314	0	0.0407321	0.0652846	0.0123681
3.57472	0.265889	0.0436672	0.0139844	0	0.0405194	0.063458	0.0144884
3.64722	0.272392	0.0436799	0.0124368	0	0.0409193	0.066942	0.0137792
3.72056	0.272466	0.0432556	0.0125766	0	0.0411293	0.0635469	0.0105722
3.79361	0.269987	0.0495058	0.0124353	0	0.0391828	0.0646313	0.0128241
3.86639	0.266708	0.0434134	0.0138031	0	0.0422843	0.0655236	0.0121574
3.93917	0.272216	0.0489831	0.0124247	0	0.0417384	0.0644675	0.0115652
4.01194	0.26863	0.0469175	0.0111146	0	0.0408352	0.0681861	0.0124445
4.08472	0.270324	0.0423425	0.0109837	0.00481686	0.042004	0.0651189	0.0115243
4.15778	0.266846	0.0446596	0.0109989	0	0.0430394	0.0666354	0.0122721
4.23056	0.269495	0.041832	0.011787	0	0.0388405	0.0648846	0.0141601
4.30333	0.268783	0.0460405	0.0123945	0	0.0425813	0.0638442	0.0127594
4.37611	0.268927	0.0440232	0.0120488	0	0.0412933	0.0638173	0.0134507
4.44944	0.269431	0.0490245	0.0120627	0	0.0418597	0.0655425	0.014402
4.52222	0.269782	0.0472986	0.0130437	0	0.0410521	0.0640012	0.0129644
4.59528	0.267693	0.0517137	0.0114765	0	0.0402559	0.0662279	0.0123746
4.66833	0.267437	0.0459853	0.0127656	0	0.0418159	0.0666296	0.0122383
4.74139	0.269743	0.0476596	0.0127705	0	0.0406445	0.065807	0.0135567
4.81444	0.268747	0.0512204	0.0119966	0	0.0418007	0.0688777	0.0128211
4.88722	0.265356	0.0516812	0.0115343	0	0.0422365	0.0675917	0.0141893
4.96	0.264611	0.045339	0.0110174	0	0.0433585	0.0677915	0.0121815
5.03333	0.265339	0.0491125	0.012267	0	0.043063	0.067376	0.0115682
5.10611	0.267258	0.0480074	0.0128148	0	0.0421558	0.070049	0.0104795
5.17889	0.269182	0.0510202	0.0113445	0	0.0438754	0.0665602	0.0113999
5.25194	0.265298	0.0498713	0.0122911	0	0.042605	0.069319	0.01334
5.32444	0.268474	0.0477357	0.0129708	0.00702925	0.0426038	0.0672746	0.0126572
5.3975	0.264106	0.0490519	0.0129274	0	0.0426129	0.0672087	0.0128293
5.47	0.265712	0.0460235	0.0117288	0	0.0416576	0.0687902	0.0127077
5.54306	0.270632	0.0491811	0.0132544	0	0.0414627	0.0676653	0.013139
5.61611	0.266014	0.0497365	0.0116059	0	0.0459947	0.0704213	0.0111565
5.68917	0.267506	0.0480516	0.0140286	0	0.0448496	0.0678846	0.0107757
5.76194	0.262144	0.0480298	0.0137276	0	0.0427531	0.0705506	0.0122926
5.83444	0.263958	0.0476662	0.0128179	0	0.0429559	0.0698474	0.0115709
5.90778	0.265932	0.0472356	0.0127418	0	0.0436607	0.0716218	0.0138473
5.98083	0.26583	0.0507051	0.0134098	0	0.0418663	0.0713202	0.0127395

## Sheet: Experimental_design
Two component three degree simplex lattice experimental design						Mixture amounts used			Design response
Std order	Pt type	Blocks	Exp name	TiO2	ZnO	TiO2 (mg)	ZnO (mg)	SBA (mg)	CO cumulative production (umol.gcat-1)	CH4 cumulative production (umol.gcat-1)
1	1	1	MO1	1	0	200.2	0	798.4	9.78426	1.57595
2	2	1	MO2	0.666667	0.333333	133.9	67.4	800.2	7.76751	0.268207
3	2	1	MO3	0.333333	0.666667	66.5	133.2	798	3.37436	0.0699447
4	1	1	MO4	0	1	0	200.4	797.7	1.93146	0.0019282
5	0	1	MO5	0.5	0.5	100.4	102.7	800	6.51695	0.230794
6	-1	1	MO6	0.75	0.25	149.5	53.5	799.6	7.24435	0.369016
7	-1	1	MO7	0.25	0.75	50.7	150.7	801.6	4.78968	0.0713456
